# Supplementary material for: A longitudinal analysis of the progression from normal blood pressure to stage 2 hypertension: A 12-year Korean cohort
Source: Springer Nature journal article supplement (doi:10.1186/s12889-020-10115-7), 2021-01-06
Supplement: MOESM1 [file 18740974]

## SUPPLEMENTAL MATERIAL

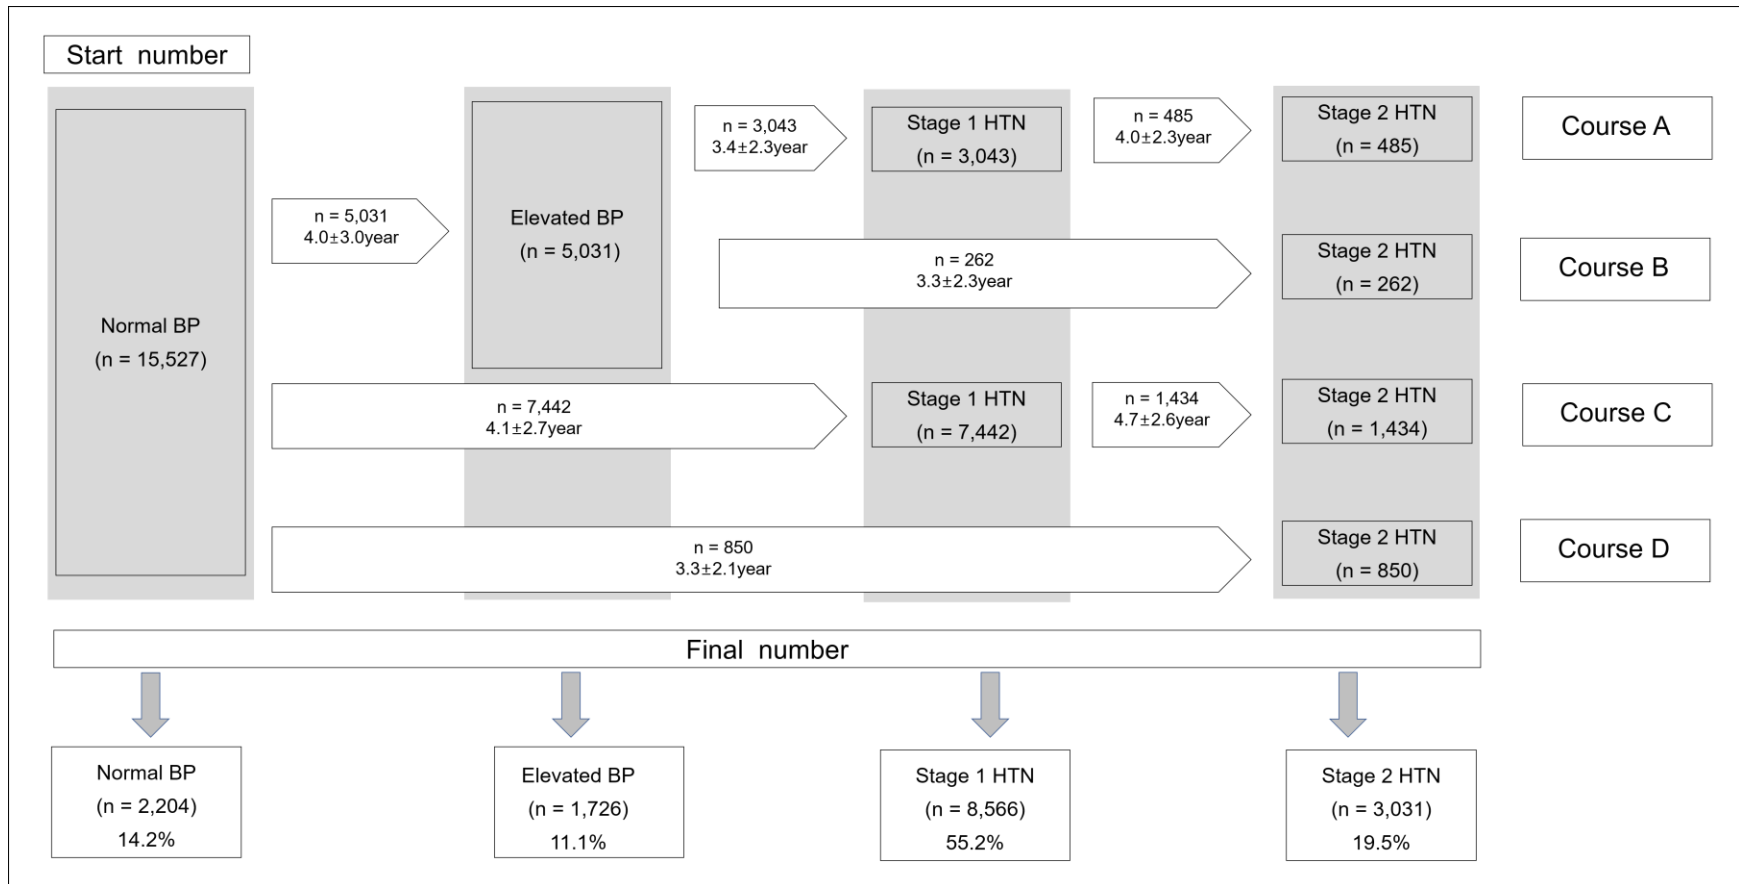

Values are expressed as n, mean ±SD (standard deviation) year. BP = blood pressure, HTN = hypertension (Ages: 40-49)

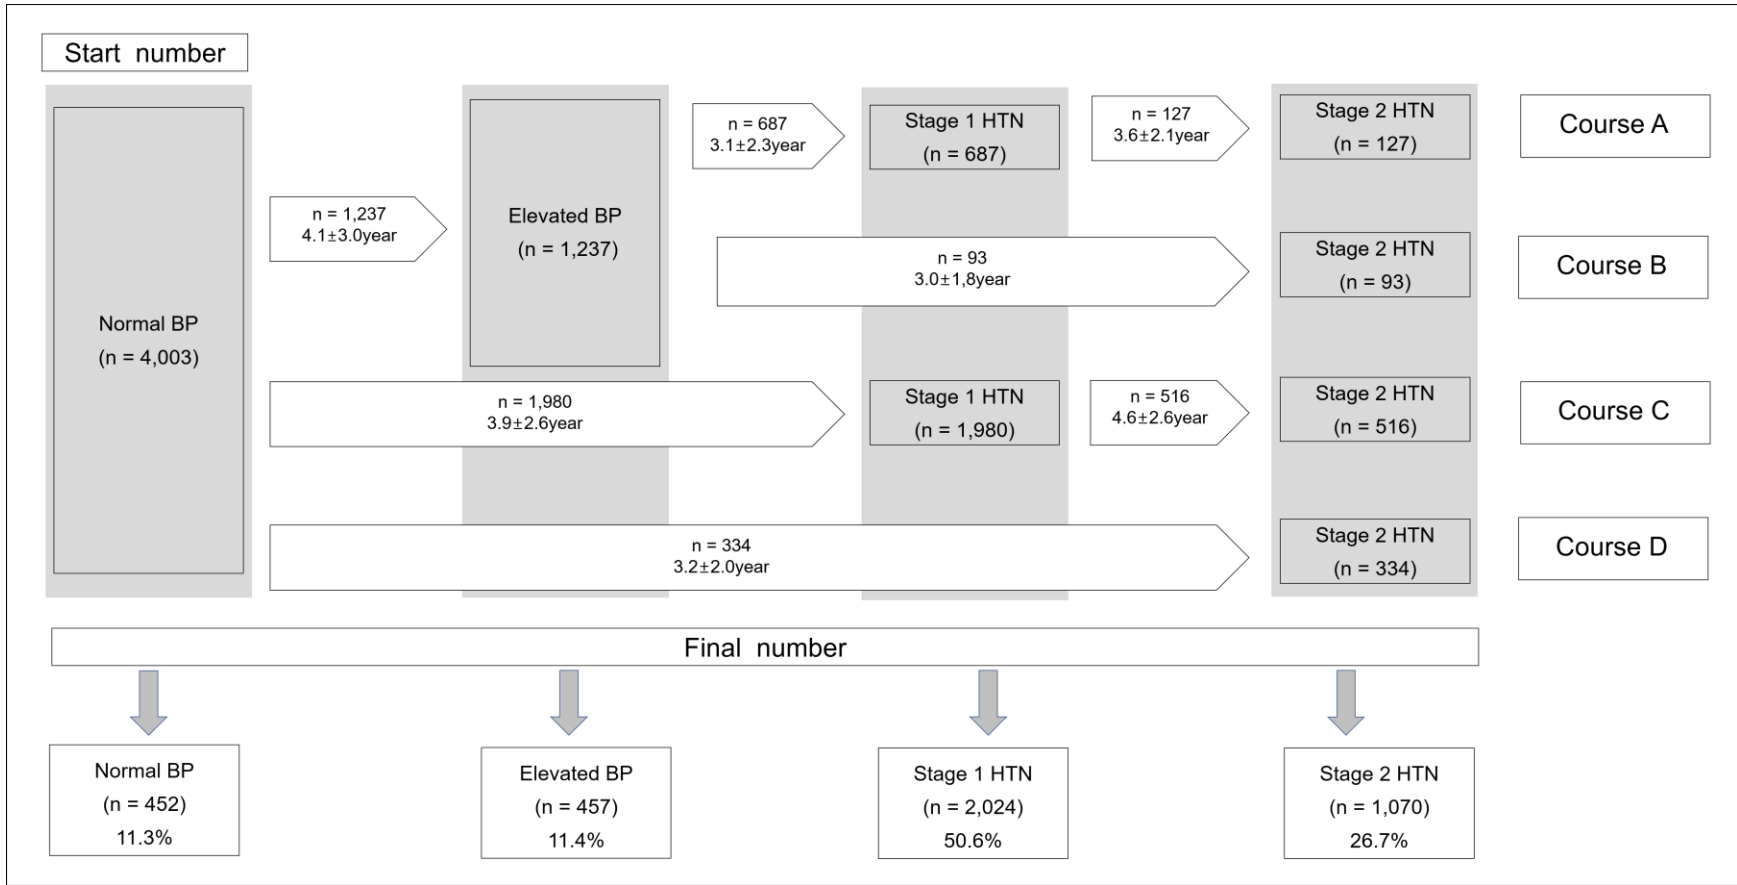

Values are expressed as n, mean ±SD (standard deviation) year. BP = blood pressure, HTN = hypertension (Ages: 50-59)

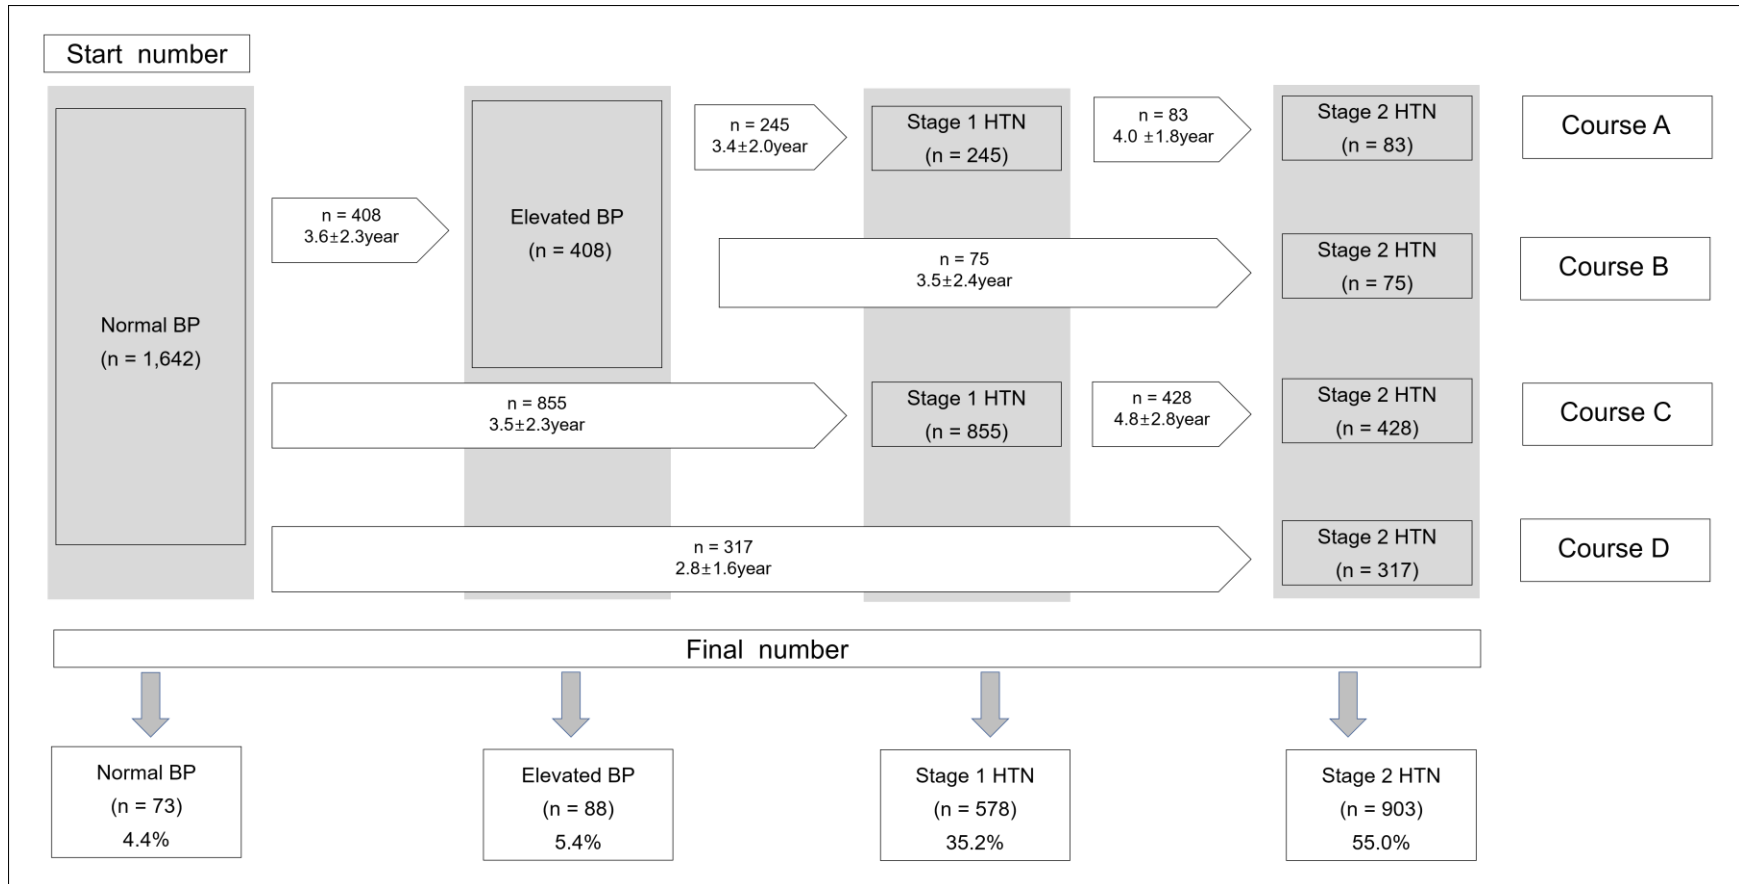

Values are expressed as n, mean  $\pm$ SD (standard deviation) year. BP = blood pressure, HTN = hypertension (Ages: 60-79)

**Supplemental figure 1. The progression from normal BP to stage2 hypertension (Ages: 40-49/50-59/60-79)**

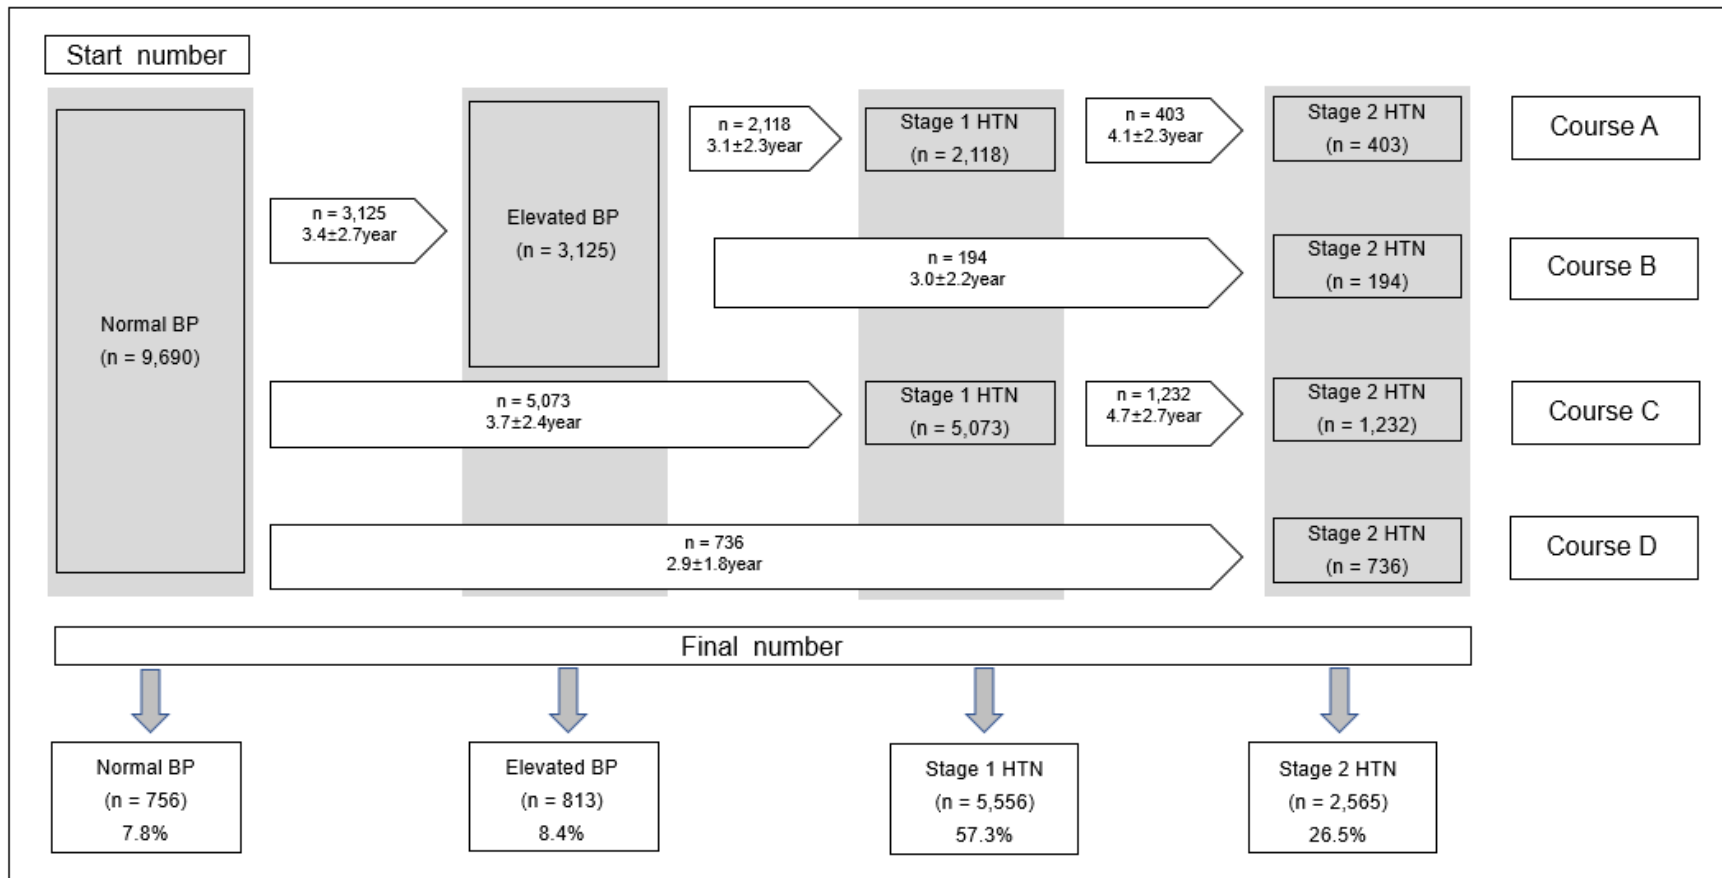

Values are expressed as n, mean  $\pm$ SD (standard deviation) year. BP = blood pressure, HTN = hypertension

**Supplemental figure 2. The progression from normal BP to stage2 hypertension (Sex: male)**

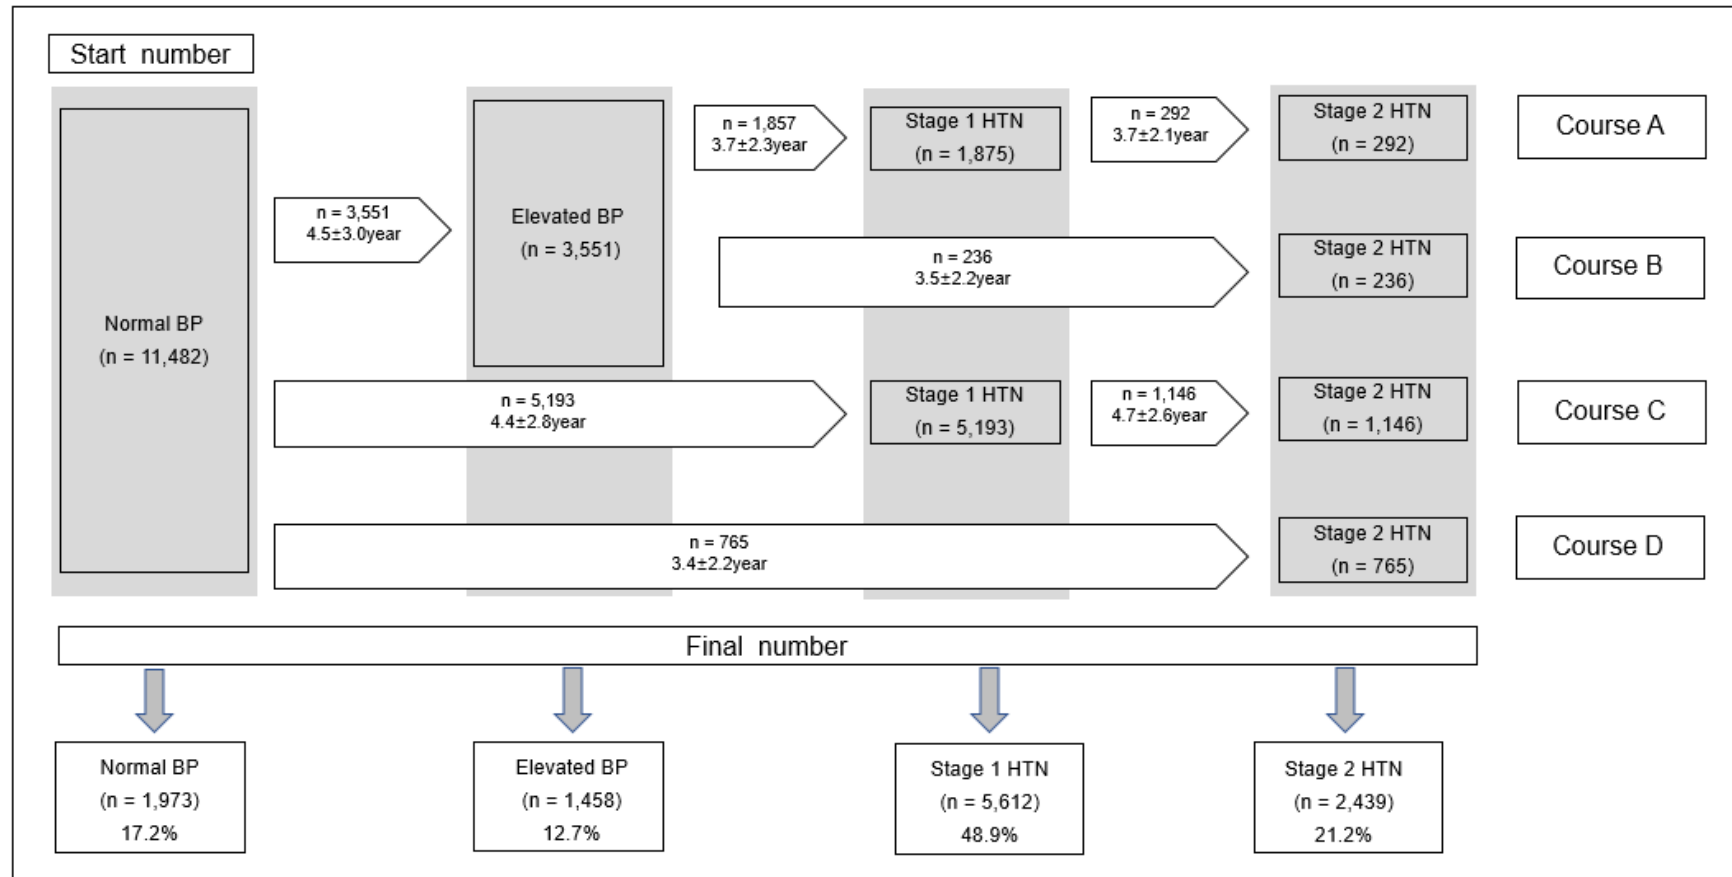

Values are expressed as n, mean  $\pm$ SD (standard deviation) year. BP = blood pressure, HTN = hypertension

**Supplemental figure 3. The progression from normal BP to stage2 hypertension (Sex: female)**

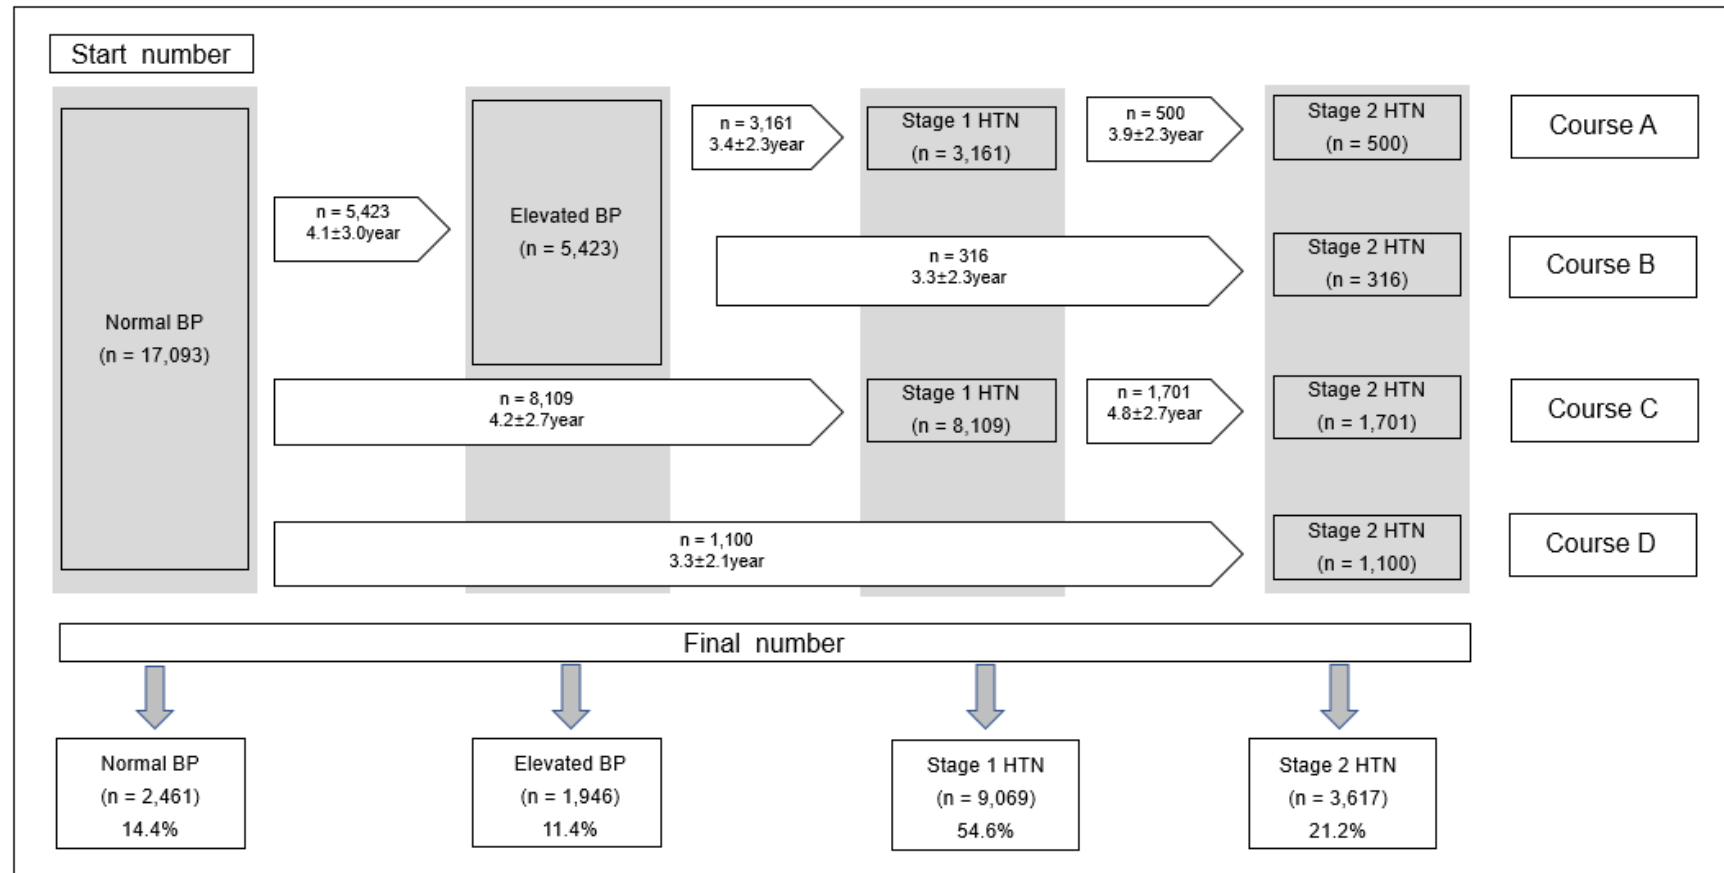

Values are expressed as n, mean  $\pm$ SD (standard deviation) year. BP = blood pressure, HTN = hypertension

**Supplemental figure 4. The progression from normal BP to stage2 hypertension (BMI<25 kg/m<sup>2</sup>)**

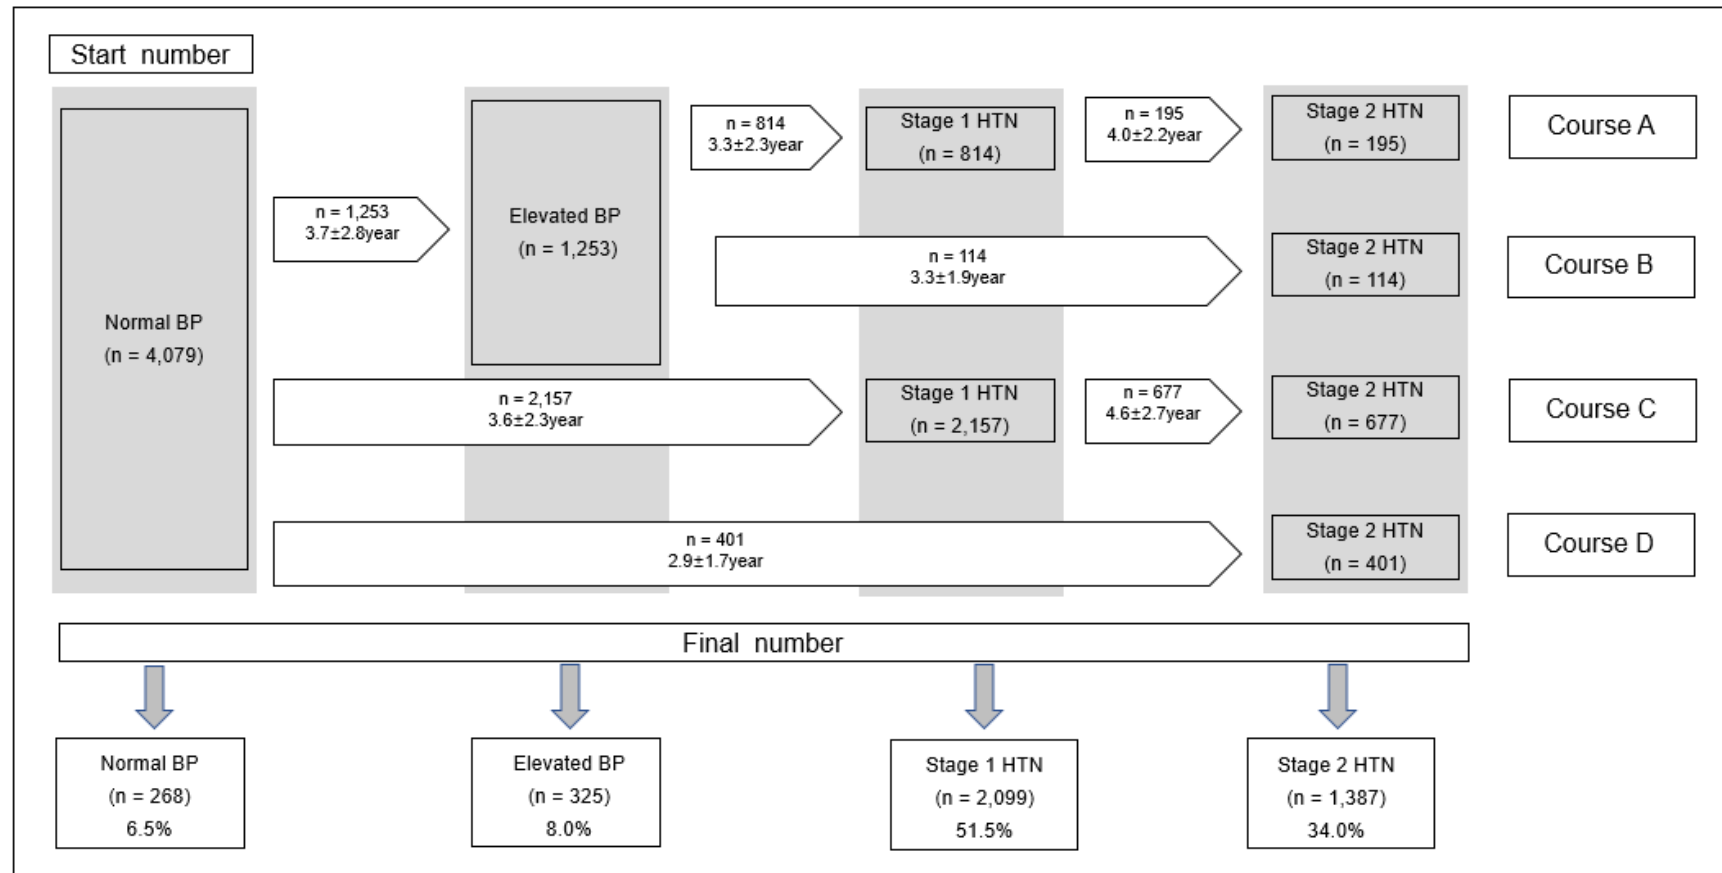

Values are expressed as n, mean ±SD (standard deviation) year. BP = blood pressure, HTN = hypertension

**Supplemental figure 5. The progression from normal BP to stage2 hypertension (BMI≥25 kg/m<sup>2</sup>)**
